# Supplementary material
Source: MDPI journal article supplement (https://www.mdpi.com/2075-5309/13/6/1489)
Supplement: s1 [file s1]

Archive with 1 entries (1 files):
- buildings-2298212-supplementary.pdf
