# Supplementary material
Source: MDPI journal article supplement (https://www.mdpi.com/2075-5309/13/6/1489)
Supplement: s1 [file s1 › buildings-2298212-supplementary.pdf]

# Mountainous City Underpass Green Space Survey Questionnaire

Hello! I am a student of Chongqing Jiaotong University. In order to provide you with a better recreation environment, this research is intended to find out your needs for underpass green space and your satisfaction with the current status of the site. The questionnaire has been reviewed by the academic committee of the College of Architecture and Urban Planning, Chongqing Jiaotong University. The questionnaire needs to be filled out anonymously with your consent. The research results are only used for research purposes, not for any commercial purpose, and promise not to disclose your personal information. We hope to hear your honest opinions and valuable comments and our deepest thanks for your cooperation!

## Part 1

1. What is your gender?

☐ A. Male

☐ B. Female

2. How old are you?

☐ A. Under 18 years old

☐ B. 19-35 years old

☐ C. 36-59 years old

☐ D. Above 60 years old

3. What is your profession?

☐ A. Students

☐ B. Working staffs

☐ C. retirees

☐ D. The unemployed (housewife, etc.)

☐ E. Others (soldiers, etc.)

4. What is your monthly income?

☐ A. Below 3000 CNY

☐ B. 3000-5000CNY

☐ C 5000-7000CNY

☐ D. 7000-10000CNY

☐ E. Above 10000CNY

5. How often do you visit the green space?

☐ A. Once a day

☐ B. Above twice a week

☐ C Once or twice a week

☐ D. Once or twice a month

☐ E. First visit

6. What is the purpose of your visit to this green space?

☐ A. Getting Close to nature

☐ B. Doing physical exercises

☐ C. Getting rest

☐ D. Recreational hobbies

☐ E. Emotional communication

☐ F. Passing by

7. How do you come to this green space?

☐ A. Walking

☐ B. Bicycle

☐ C. Motor vehicle

☐ D. Rail transit

☐ E. Bus

## Part 2

### I Reachability

#### A. Path organization perception

a. How do you think about the importance of the time to reach the green space?

☐Very unimportant      ☐Unimportant      ☐Average      ☐Important      ☐Very important

b. How do you think about the importance of the visibility and convenience of entrances and exits (including the location of the green space, the surrounding traffic conditions) of the green space?

☐Very unimportant      ☐Unimportant      ☐Average      ☐Important      ☐Very important

c. How do you think about the importance of the connectivity of the internal spatial point positions (internal road convenience) of the green space?

☐Very unimportant      ☐Unimportant      ☐Average      ☐Important      ☐Very important

d. How do you think about the importance of the guidances of identification system (guides, signs and road signs, etc.) of the green space?

☐Very unimportant      ☐Unimportant      ☐Average      ☐Important      ☐Very important

e. How do you think about the importance of the suitability of step or road slope of the green space?

☐Very unimportant      ☐Unimportant      ☐Average      ☐Important      ☐Very important

### II Perception quality

#### B. Safety and security perception

f. How do you think about the importance of the security of the arrival path of the green space?

☐Very unimportant      ☐Unimportant      ☐Average      ☐Important      ☐Very important

g. How do you think about the importance of the public security management(including monitoring equipment) of the green space?

☐Very unimportant      ☐Unimportant      ☐Average      ☐Important      ☐Very important

h. How do you think about the importance of the night lighting conditions of the green space?

☐Very unimportant      ☐Unimportant      ☐Average      ☐Important      ☐Very important

i. How do you think about the importance of the smoothness and slip resistance of pavement of the green space?

☐Very unimportant      ☐Unimportant      ☐Average      ☐Important      ☐Very important

C. Aesthetic perception

j. How do you think about the importance of the coordination between green space and the surrounding environment?

☐Very unimportant      ☐Unimportant      ☐Average      ☐Important      ☐Very important

k. How do you think about the importance of the ornamental of vegetation (color, quantity and type, growth, etc.) of the green space?

☐Very unimportant      ☐Unimportant      ☐Average      ☐Important      ☐Very important

l. How do you think about the importance of the visual senses of terrain relief of the green space?

☐Very unimportant      ☐Unimportant      ☐Average      ☐Important      ☐Very important

m. How do you think about the importance of the artistry of public art facilities (sculpture, landscape wall and stone, etc.) of the green space?

☐Very unimportant      ☐Unimportant      ☐Average      ☐Important      ☐Very important

D. Physical environment perception

n. How do you think about the importance of the effect of noise reduction and sound insulation of the green space?

☐Very unimportant      ☐Unimportant      ☐Average      ☐Important      ☐Very important

o. How do you think about the importance of the comfort of the microclimate of the green space?

☐Very unimportant      ☐Unimportant      ☐Average      ☐Important      ☐Very important

p. How do you think about the importance of the environmental sanitation and relevant facilities of the green space?

☐Very unimportant      ☐Unimportant      ☐Average      ☐Important      ☐Very important

E. Activity and cultural perception

q. How do you think about the importance of the distribution and quantity of leisure facilities of the green space?

☐Very unimportant      ☐Unimportant      ☐Average      ☐Important      ☐Very important

r. How do you think about the importance of the adequacy of activity venues of the green space?

☐Very unimportant      ☐Unimportant      ☐Average      ☐Important      ☐Very important

s. How do you think about the importance of the distribution and quantity of sports facilities of the green space?

☐Very unimportant      ☐Unimportant      ☐Average      ☐Important      ☐Very important

t. How do you think about the importance of the adequacy of children's playgrounds and equipment of the green space?

☐Very unimportant      ☐Unimportant      ☐Average      ☐Important      ☐Very important

u. How do you think about the importance of the promotion of culture and history & the education of science of the green space?

☐Very unimportant      ☐Unimportant      ☐Average      ☐Important      ☐Very important

### Part 3

#### I Reachability

A Path organization perception

a. To what degree are you satisfied with the time to reach the green space?

☐Very dissatisfied      ☐Dissatisfied      ☐Average      ☐Satisfied      ☐Very satisfied

b. To what degree are you satisfied with the visibility and convenience of entrances and exits (including the location of the green space, the surrounding traffic conditions) of the green space?

☐Very dissatisfied      ☐Dissatisfied      ☐Average      ☐Satisfied      ☐Very satisfied

c. To what degree are you satisfied with the connectivity of the internal spatial point positions (internal road convenience) of the green space?

☐Very dissatisfied      ☐Dissatisfied      ☐Average      ☐Satisfied      ☐Very satisfied

d. To what degree are you satisfied with the guides of identification system (guides, signs and road signs, etc.) of the green space?

☐Very dissatisfied      ☐Dissatisfied      ☐Average      ☐Satisfied      ☐Very satisfied

e. To what degree are you satisfied with the suitability of step or road slope of the green space?

☐Very dissatisfied    ☐Dissatisfied    ☐Average    ☐Satisfied    ☐Very satisfied

## **II Perception quality**

### **B. Safety and security perception**

f. To what degree are you satisfied with the security of the arrival path of the green space?

☐Very dissatisfied    ☐Dissatisfied    ☐Average    ☐Satisfied    ☐Very satisfied

g. To what degree are you satisfied with the public security management(including monitoring equipment) of the green space?

☐Very dissatisfied    ☐Dissatisfied    ☐Average    ☐Satisfied    ☐Very satisfied

h. To what degree are you satisfied with the night lighting conditions of the green space?

☐Very dissatisfied    ☐Dissatisfied    ☐Average    ☐Satisfied    ☐Very satisfied

i. To what degree are you satisfied with the smoothness and slip resistance of pavement of the green space?

☐Very dissatisfied    ☐Dissatisfied    ☐Average    ☐Satisfied    ☐Very satisfied

### **C. Aesthetic perception**

j. To what degree are you satisfied with the coordination between green space and the surrounding environment?

☐Very dissatisfied    ☐Dissatisfied    ☐Average    ☐Satisfied    ☐Very satisfied

k. To what degree are you satisfied with the ornamental of vegetation (color, quantity and type, growth, etc.) of the green space?

☐Very dissatisfied    ☐Dissatisfied    ☐Average    ☐Satisfied    ☐Very satisfied

l. To what degree are you satisfied with the visual senses of terrain relief of the green space?

☐Very dissatisfied    ☐Dissatisfied    ☐Average    ☐Satisfied    ☐Very satisfied

m. To what degree are you satisfied with the artistry of public art facilities (sculpture, landscape wall and stone, etc.) of the green space?

☐Very dissatisfied    ☐Dissatisfied    ☐Average    ☐Satisfied    ☐Very satisfied

### **D. Physical environment perception**

n. To what degree are you satisfied with the effect of noise reduction and sound insulation of the green space?

☐Very dissatisfied    ☐Dissatisfied    ☐Average    ☐Satisfied    ☐Very satisfied

o. To what degree are you satisfied with the comfort of the microclimate of the green space?

☐Very dissatisfied    ☐Dissatisfied    ☐Average    ☐Satisfied    ☐Very satisfied

p. To what degree are you satisfied with the environmental sanitation and relevant facilities of the green space?

☐Very dissatisfied    ☐Dissatisfied    ☐Average    ☐Satisfied    ☐Very satisfied

E. Activity and cultural perception

q. To what degree are you satisfied with the distribution and quantity of leisure facilities of the green space?

☐Very dissatisfied    ☐Dissatisfied    ☐Average    ☐Satisfied    ☐Very satisfied

r. To what degree are you satisfied with the adequacy of activity venues of the green space?

☐Very dissatisfied    ☐Dissatisfied    ☐Average    ☐Satisfied    ☐Very satisfied

s. To what degree are you satisfied with the distribution and quantity of sports facilities of the green space?

☐Very dissatisfied    ☐Dissatisfied    ☐Average    ☐Satisfied    ☐Very satisfied

t. To what degree are you satisfied with the adequacy of children's playgrounds and equipment of the green space?

☐Very dissatisfied    ☐Dissatisfied    ☐Average    ☐Satisfied    ☐Very satisfied

u. To what degree are you satisfied with the promotion of culture and history & the education of science of the green space?

☐Very dissatisfied    ☐Dissatisfied    ☐Average    ☐Satisfied    ☐Very satisfied

Thank you again for your cooperation and wish you a happy life!
